# Supplementary material
Source: PubMed Central journal article supplement (PMC7593816)
Supplement: NIHMS1622895-supplement-1.pdf [file NIHMS1622895-supplement-1.pdf]

**Table S1. cryoEM Data collection, model refinement and validation. Related to Figure 1A**

| <b>Structures</b>                          | <b>HTR2A-miniGαq</b> |
|--------------------------------------------|----------------------|
| <b>Data Collection</b>                     |                      |
| Magnification                              | 57,050               |
| Voltage (kV)                               | 300                  |
| Dose per frame(e-/Å <sup>2</sup> )         | 1.03                 |
| Electron exposure (e-/ Å <sup>2</sup> )    | 80                   |
| Defocus Range (μm)                         | -0.8 to -2.6         |
| Pixel size (Å)                             | 0.8521               |
| Symmetry imposed                           | C1                   |
| Number of Micrographs                      | 2,368                |
| Initial particle images (no.)              | 2,712,613            |
| Final particle images (no.)                | 166,497              |
| Map resolution (Å)                         | 3.36                 |
| FSC threshold                              | 0.143                |
| <b>Refinement Statistics</b>               |                      |
| Model Resolution (Å)                       | 3.4                  |
| FSC threshold                              | 0.5                  |
| Map sharpening B factor ( Å <sup>2</sup> ) | -106.4               |
| <b>Model composition</b>                   |                      |
| Total number of atoms                      | 8,576                |
| No. of protein residues                    | 1,122                |
| No. of ligands                             | 1                    |
| <b>Model validation</b>                    |                      |
| CC (mask) map vs. model (%)                | 83                   |
| RMSD                                       |                      |
| Bond length (Å) / Bond angles (°)          | 0.004 / 0.647        |
| Ramachandran plot statistics               |                      |
| Most favored (%)                           | 100                  |
| Outliers (%)                               | 0                    |
| Rotamer outliers (%)                       | 2.34                 |
| C-beta deviations                          | 0.00                 |
| Clash score                                | 5.72                 |

**Table S2. Data Collection and Refinement Statistics (X-ray crystallography).**

| <b>Structures</b>                        | <b>HTR2A-BRIL (LSD)</b>                                                                  | <b>HTR2A-BRIL (methiothepin)</b> |
|------------------------------------------|------------------------------------------------------------------------------------------|----------------------------------|
| <b>Data Collection</b>                   | APS, GMCA/CAT 23ID-B, 1.033 Å, 10- $\mu$ m<br>NSLS-II, FMX 17-ID-2, 1.033 Å, 10- $\mu$ m |                                  |
| Crystals                                 | 25                                                                                       | 16                               |
| Resolution (Å)                           | 34.5 – 3.4 (3.61-3.40)                                                                   | 34.8 -3.4 (3.61-3.40)            |
| Space group                              | C222 <sub>1</sub>                                                                        | C222 <sub>1</sub>                |
| Complexes/ASU                            | 3                                                                                        | 3                                |
| Unit cell dimensions <i>a, b, c</i> (Å)  | 81.64 175.26 280.67                                                                      | 82.38 177.31 280.59              |
| $\alpha, \beta, \gamma$ (°)              | 90 90 90                                                                                 | 90 90 90                         |
| No. total reflections                    | 171,800 (9,294)                                                                          | 159,514 (23,600)                 |
| No. unique reflections                   | 27,254 (3,762)                                                                           | 28,636 (4,578)                   |
| Multiplicity                             | 6.3 (2.5)                                                                                | 5.6 (5.2)                        |
| Completeness (%)                         | 96.8 (84.9)                                                                              | 99.7 (99.8)                      |
| Mean <i>I</i> / $\sigma$ ( <i>I</i> )    | 5.5 (1.0)                                                                                | 5.8 (1.2)                        |
| R <sub>merge</sub> (%)                   | 20.0 (80.6)                                                                              | 16.4 (119.7)                     |
| CC <sub>1/2</sub> (%)                    | 96.8 (84.9)                                                                              | 99.5 (66.0)                      |
| <b>Refinement Statistics</b>             |                                                                                          |                                  |
| Resolution used in refinement (Å)        | 34.5 -3.4 (3.55-3.42)                                                                    | 33.2 -3.4 (3.52-3.40)            |
| No. reflections used in refinement       | 20,947 (188)                                                                             | 26,099 (1,239)                   |
| No. reflections used for R-free          | 1,072 (9)                                                                                | 1,336 (63)                       |
| R-work (%)                               | 26.7 (43.2)                                                                              | 25.9 (28.5)                      |
| R-free (%)                               | 30.1 (57.7)                                                                              | 29.8 (30.1)                      |
| <b>Number of atoms</b>                   |                                                                                          |                                  |
| HTR2A-BRIL                               | 7,874                                                                                    | 7,850                            |
| Ligands (LSD or methiothepin)            | 72 (LSD)                                                                                 | 72 (methiothepin)                |
| Lipids                                   | 148                                                                                      | 173                              |
| <b>Overall B-factors (Å<sup>2</sup>)</b> |                                                                                          |                                  |
| HTR2A-BRIL                               | 52.9                                                                                     | 45.9                             |
| Ligands (LSD or methiothepin)            | 41.1(LSD)                                                                                | 30.4 (methiothepin)              |
| Lipids                                   | 51.4                                                                                     | 56.2                             |
| <b>Model Statistics</b>                  |                                                                                          |                                  |
| RMSD Bond (Å)                            | 0.013                                                                                    | 0.012                            |
| RMSD Angles (°)                          | 1.45                                                                                     | 1.43                             |
| Ramachandran Favored (%) <sup>a</sup>    | 97.37                                                                                    | 94.95                            |
| Ramachandran Allowed (%) <sup>a</sup>    | 2.63                                                                                     | 5.05                             |
| Ramachandran Outliers (%) <sup>a</sup>   | 0.00                                                                                     | 0.00                             |
| Rotamer outliers (%) <sup>a</sup>        | 0.14                                                                                     | 0.28                             |
| Molprobit score <sup>a</sup>             | 1.86                                                                                     | 2.09                             |

Related to Figure 1B and C.

Highest-resolution shell is shown in parentheses.

<sup>a</sup>As defined in MolProbity.

**Table S3.** Analysis of the ligand-binding pocket in the HTR2A structures. Related to Figure 2. Solvent accessible (SA) volume and area are analyzed using CASTp 3.0 server. Probe radius of 2.0 is used in this analysis.

|                           | HTR2A/methiothepin | HTR2A/LSD | HTR2A/25CN-NBOH |
|---------------------------|--------------------|-----------|-----------------|
| Area_SA/A <sup>2</sup>    | 427.8              | 333.7     | 535.9           |
| Volume_SA/ A <sup>3</sup> | 188.1              | 153.1     | 287.0           |

**Table S4.** HTR2A Gq dissociation (BRET 2) and mini-Gq association (BRET 1) assays of wild-type HTR2A. Related Figure 1E and Figure 1F. EC<sub>50</sub> and E<sub>max</sub> estimates represent the average and standard error of the mean (SEM) from three independent experiments performed in triplicate; data for Fig 1E and Fig 1F were from obtained independently. E<sub>max</sub> is defined as percent 5-HT maximum response. N.P.=not performed

| Ligand                                | BRET 2<br>HTR2A/Gq                                 |                            | BRET 1<br>HTR2A/mini-Gq                            |                            |
|---------------------------------------|----------------------------------------------------|----------------------------|----------------------------------------------------|----------------------------|
|                                       | EC <sub>50</sub> , nM<br>(pEC <sub>50</sub> ± SEM) | E <sub>max</sub><br>% 5-HT | EC <sub>50</sub> , nM<br>(pEC <sub>50</sub> ± SEM) | E <sub>max</sub><br>% 5-HT |
| 25CN-NBOH<br>(Fig 1E)                 | 0.87<br>(9.06 ± 0.08)                              | 93.1 ± 2.2                 | 1.71<br>(8.77 ± 0.10)                              | 89.2 ± 2.8                 |
| Ligands<br>(Hallucinogens;<br>Fig 1F) |                                                    |                            | EC <sub>50</sub> , nM<br>(pEC <sub>50</sub> ± SEM) | E <sub>max</sub><br>% 5-HT |
| 25CN-NBOH                             | N.P.                                               | N.P.                       | 1.87 (8.73 ± 0.09)                                 | 89.4 ± 2.5                 |
| LSD                                   | N.P.                                               | N.P.                       | 1.57 (8.80 ± 0.15)                                 | 54.8 ± 2.4                 |
| DOI                                   | N.P.                                               | N.P.                       | 6.22 (8.21 ± 0.10)                                 | 83.9 ± 2.7                 |
| Psilocin                              | N.P.                                               | N.P.                       | 25.60 (7.59 ± 0.24)                                | 33.8 ± 3.1                 |

**Table S5.** Gq dissociation (BRET 2) and arrestin association (BRET1) parameter estimates for various ligands at wild-type and mutant HTR2A receptors. Related to Figure 3D, Figure 5C and Figure 7. Data were acquired by BRET 2 assay conducted in parallel. EC<sub>50</sub> and Emax estimates represent the average and standard error of the mean (SEM) from three independent experiments performed in triplicate. Emax is defined as percent WT maximum response. N.D; no detected activity. (\*\*\*\* p<0.0001, \*\*\* p<0.001, \*\* p<0.01 and \* p<0.05 vs WT)

| HTR2A Constructs                                | 5-HT                                               |                | 25CN-NBOH                                          |                | LSD                                                |                    |
|-------------------------------------------------|----------------------------------------------------|----------------|----------------------------------------------------|----------------|----------------------------------------------------|--------------------|
|                                                 | EC <sub>50</sub> , nM<br>(pEC <sub>50</sub> ± SEM) | Emax<br>% WT   | EC <sub>50</sub> , nM<br>(pEC <sub>50</sub> ± SEM) | Emax<br>% WT   | EC <sub>50</sub> , nM<br>(pEC <sub>50</sub> ± SEM) | Emax<br>% WT       |
| <b>Fig 3D;<br/>BRET 2<br/>(HTR2A<br/>/Gq)</b>   |                                                    |                |                                                    |                |                                                    |                    |
| WT                                              | 4.65<br>(8.33 ± 0.07)                              | 100.3 ± 2.2    | 0.59<br>(9.23 ± 0.05)                              | 99.4 ± 1.8     | 0.96<br>(9.02 ± 0.08)                              | 99.7 ± 2.9         |
| D155A                                           | N.D                                                | N.D            | N.D                                                | N.D            | 92.53<br>(7.03 ± 0.80)****                         | 39.6 ±<br>19.0**** |
| S159A                                           | 732.00<br>(6.14 ± 0.16)****                        | 97.9 ± 8.8     | 95.17<br>(7.02 ± 0.39)****                         | 74.9 ± 17.6    | 4.30<br>(8.37 ± 0.20)                              | 119.4 ± 9.1        |
| L229A                                           | 172.30<br>(6.77 ± 0.13)****                        | 82.0 ± 4.7*    | 4.64<br>(8.33 ± 0.14)**                            | 67.6 ± 3.7**   | 46.79<br>(7.33 ± 0.33)****                         | 64.6 ± 10.9**      |
| G238A                                           | 7.45<br>(8.13 ± 0.18)                              | 64.7 ± 3.8**** | 0.50<br>(9.31 ± 0.15)                              | 63.6 ± 3.1***  | 0.68<br>(9.17 ± 0.17)                              | 61.7 ± 3.7**       |
| S239A                                           | 126.70<br>(6.90 ± 0.12)****                        | 89.2 ± 5.0     | 9.88<br>(8.01 ± 0.14)****                          | 89.4 ± 5.5     | 3.03<br>(8.52 ± 0.17)                              | 98.5 ± 6.1         |
| S242A                                           | 7.74<br>(8.11 ± 0.14)                              | 84.3 ± 4.1     | 1.50<br>(8.82 ± 0.09)                              | 107.2 ± 3.5    | 3.75<br>(8.43 ± 0.14)                              | 113.2 ± 6.2        |
| W336A                                           | N.D                                                | N.D            | N.D                                                | N.D            | N.D                                                | N.D                |
| F339L                                           | 82.81<br>(7.08 ± 0.35)****                         | 44.4 ± 6.7**** | 152.90<br>(6.82 ± 0.22)****                        | 51.4 ± 7.4**** | 7.90<br>(8.10 ± 0.18)                              | 47.4 ± 3.7****     |
| G369A                                           | 14.01<br>(7.85 ± 0.34)                             | 33.2 ± 4.2**** | N.D                                                | N.D            | 10.68<br>(7.97 ± 0.25)*                            | 44.6 ± 4.9****     |
| S372A                                           | 8.02<br>(8.10 ± 0.21)                              | 77.6 ± 5.7**   | 0.74<br>(9.13 ± 0.28)                              | 87.0 ± 8.5     | 1.10<br>(8.96 ± 0.20)                              | 89.2 ± 0.2         |
| <b>Fig 7;<br/>BRET 2<br/>(HTR2A<br/>/Gq)</b>    |                                                    |                |                                                    |                |                                                    |                    |
| WT                                              | 1.52 (8.82 ±<br>0.10)                              | 99.8 ± 3.0     | 0.38 (9.42 ±<br>0.11)                              | 100.1 ±<br>3.5 | 0.66 (9.18 ±<br>0.08)                              | 101.4 ±<br>3.0     |
| I181A                                           | 163.1 (6.79 ±<br>0.10)                             | 61.7 ± 2.7     | N.D                                                | N.D            | N.D                                                | N.D                |
| I181E                                           | 404.4 (6.39 ±<br>0.23)                             | 48.9 ± 5.5     | N.D                                                | N.D            | N.D                                                | N.D                |
| <b>Fig 7;<br/>BRET 1<br/>(HTR2A<br/>/βArr2)</b> |                                                    |                |                                                    |                |                                                    |                    |
| WT                                              | 43.18 (7.37 ±<br>0.12)                             | 99.3 ± 4.7     | 5.48 (8.26 ±<br>0.14)                              | 100.3 ±<br>0.1 | 15.37 (7.81 ±<br>0.15)                             | 98.9 ± 5.6         |
| I181A                                           | 15.1 (7.82 ±<br>0.14)                              | 172.2 ± 9.2    | 4.27 (8.37 ±<br>0.19)                              | 136.3 ±<br>8.3 | 4.21 (8.38 ±<br>0.17)                              | 125.5 ±<br>6.9     |

|                                 |                                                    |                          |                                                    |                          |                                                    |                          |
|---------------------------------|----------------------------------------------------|--------------------------|----------------------------------------------------|--------------------------|----------------------------------------------------|--------------------------|
| I181E                           | 14 (7.85 ± 0.14)                                   | 162.8 ± 8.5              | 3.69 (8.43 ± 0.15)                                 | 204.6 ± 10.1             | 8.4 (8.08 ± 0.12)                                  | 137.1 ± 6.0              |
| Fig 5C;<br>BRET2<br>(HTR2A /Gq) |                                                    |                          |                                                    |                          |                                                    |                          |
| WT                              | 5-HT                                               |                          | TRYPTAMINE                                         |                          | LSD                                                |                          |
|                                 | EC <sub>50</sub> , nM<br>(pEC <sub>50</sub> ± SEM) | E <sub>max</sub> %<br>WT | EC <sub>50</sub> , nM<br>(pEC <sub>50</sub> ± SEM) | E <sub>max</sub> %<br>WT | EC <sub>50</sub> , nM<br>(pEC <sub>50</sub> ± SEM) | E <sub>max</sub> %<br>WT |
| WT                              | 9.83 (8.00 ± 0.16)                                 | 100.0 ± 5.5              | 71.32 (7.15 ± 0.13)                                | 100.0 ± 4.6              | 1.15 (8.94 ± 0.09)                                 | 100.0 ± 2.6              |
| N343A                           | 335.1 (6.48 ± 0.1611)                              | 100.5 ± 5.0              | 173 (6.76 ± 0.12)                                  | 90.5 ± 4.5               | 0.56 (9.25 ± 0.16)                                 | 85.2 ± 3.8               |

**Table S6.** Binding affinities for 5-HT, 25CN-NBOH, LSD, and methiothepin at binding pocket mutants. Related to Figure 3D. Competitive binding was performed at 0.42 nM of [<sup>3</sup>H]-LSD. All values indicate mean ± SEM from at least three independent experiments. ND=no detectible binding

| HTR2A | B <sub>max</sub> ± SEM<br>(pmol/mg protein) | K <sub>d</sub> , nM ± SEM | [ <sup>3</sup> H]-LSD, 0.42 nM<br>pK <sub>i</sub> ± SEM |             |             |              |
|-------|---------------------------------------------|---------------------------|---------------------------------------------------------|-------------|-------------|--------------|
|       |                                             |                           | 5-HT                                                    | 25CN-NBOH   | LSD         | METHIOTHEPIN |
| WT    | 763.8 ± 27.9                                | 1.09 ± 0.13               | 7.49 ± 0.07                                             | 9.08 ± 0.03 | 8.63 ± 0.07 | 9.70 ± 0.05  |
| D155A | N.D                                         | N.D                       | N.D                                                     | N.D         | N.D         | N.D          |
| S159A | 886.1 ± 122.1                               | 2.33 ± 0.82               | 5.49 ± 0.33                                             | 6.92 ± 0.11 | 8.84 ± 0.05 | 9.68 ± 0.03  |
| L229A | 671.9 ± 299.5                               | 6.94 ± 6.17               | 7.04 ± 0.14                                             | 8.54 ± 0.08 | 9.12 ± 0.05 | 10.05 ± 0.04 |
| G238A | 251.5 ± 20.6                                | 0.42 ± 0.12               | 7.43 ± 0.07                                             | 8.39 ± 0.06 | 8.25 ± 0.07 | 9.42 ± 0.03  |
| S239A | 999.9 ± 74.2                                | 3.36 ± 0.66               | 6.20 ± 0.10                                             | 8.06 ± 0.06 | 8.10 ± 0.05 | 9.24 ± 0.06  |
| S242A | 1,098.0 ± 70.5                              | 2.04 ± 0.40               | 7.47 ± 0.15                                             | 8.64 ± 0.09 | 8.17 ± 0.09 | 9.49 ± 0.06  |
| W336L | N.D                                         | N.D                       | N.D                                                     | N.D         | N.D         | N.D          |
| F339L | N.D                                         | N.D                       | N.D.                                                    | N.D.        | N.D.        | N.D.         |
| G369A | 221.8 ± 43.7                                | 1.91 ± 1.01               | 7.74 ± 0.14                                             | 8.89 ± 0.09 | 8.56 ± 0.11 | 8.50 ± 0.11  |



**Table S7.** Gq dissociation assay (BRET 2) with wild-type and mutants (Gq interface) of HTR2A and Gq. Related to Figure 6. Data were acquired by BRET 2 assay conducted in parallel. EC<sub>50</sub> and Emax estimates represent the average and standard error of the mean (SEM) from three independent experiments performed in triplicate. Emax is defined as percent WT maximum response. N.D; no detected activity. (\*\*\*\*p<0.0001 and \*p<0.05 vs WT)

| HTR2A<br>Constructs | 25CN-NBOH                                       |                |
|---------------------|-------------------------------------------------|----------------|
|                     | EC <sub>50</sub> , nM (pEC <sub>50</sub> ± SEM) | Emax, % WT     |
| WT                  | 0.41 (9.39 ± 0.05)                              | 99.6 ± 1.7     |
| N107A               | 1.53 (8.81 ± 0.26)*                             | 60.8 ± 5.9**** |
| D172A               | 0.30 (9.53 ± 0.20)                              | 45.6 ± 2.9**** |
| I181A               | N.D                                             | N.D            |
| I181E               | N.D                                             | N.D            |
| R185A               | 0.76 (9.12 ± 0.15)                              | 75.2 ± 4.0**** |
| N317A               | 0.58 (9.23 ± 0.13)                              | 111.3 ± 4.9    |
| L325A               | 198.30 (6.70 ± 0.22)****                        | 55.8 ± 8.2**** |
| N384A               | 17.34 (7.76 ± 0.22)****                         | 66.1 ± 6.6**** |
| K385A               | 0.22 (9.67 ± 0.13)                              | 86.1 ± 3.6     |
| Gq<br>Constructs    | 25CN-NBOH                                       |                |
|                     | EC <sub>50</sub> , nM (pEC <sub>50</sub> ± SEM) | Emax, % WT     |
| WT                  | 0.49 (9.31 ± 0.06)                              | 100.1 ± 2.0    |
| Q350A               | N.D                                             | N.D            |
| E355A               | 0.87 (9.06 ± 0.13)                              | 115.4 ± 5.4*   |
| Y356A               | 0.38 (9.42 ± 0.17)                              | 108.2 ± 6.0    |
| Y356F               | 0.54 (9.27 ± 0.12)                              | 107.8 ± 4.3    |
| N357A               | 6.16 (8.21 ± 0.08)****                          | 75.6 ± 2.6**** |
| L358A               | N.D                                             | N.D            |
